# Supplementary material
Source: PubMed Central journal article supplement (PMC3764863)
Supplement: bph0170-0222-SD1.pdf [file bph0170-0222-SD1.pdf]

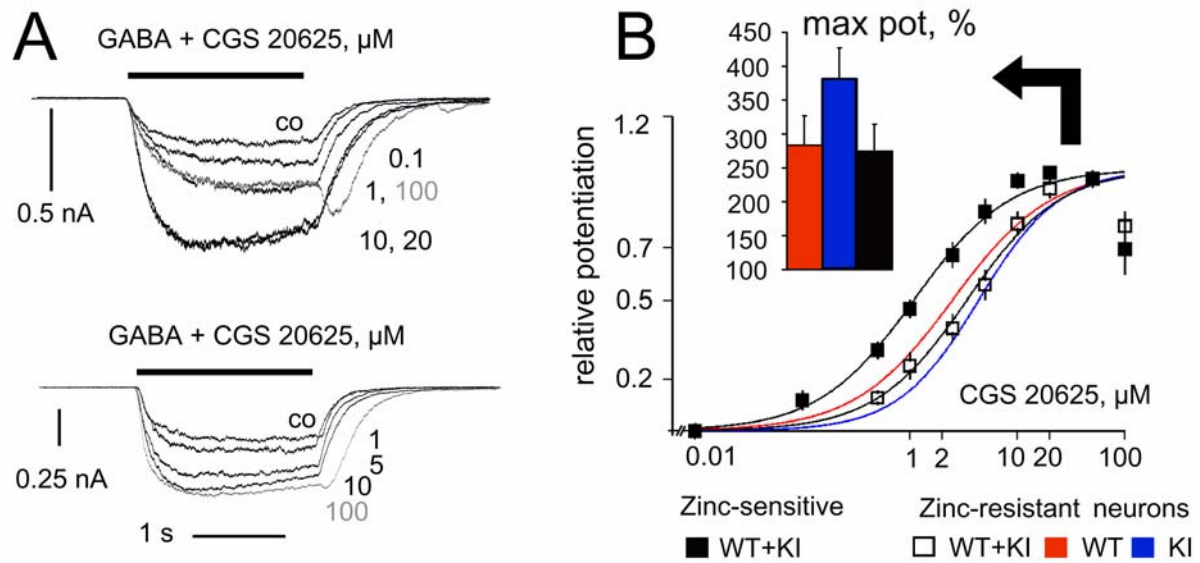

**Supplementary Figure 1.** Modulation of GABA-evoked currents by CGS 20625 in mouse TMN neurons. A. Representative recordings (upper panel shows recordings from zinc-sensitive WT neuron and lower panel from zinc-resistant KI neuron). B. Averaged concentration-response diagrams for the relative potentiation of GABA-responses by CGS 20625 in pooled KI and WT zinc-sensitive ( $EC_{50}=1.1 \pm 0.1 \mu\text{M}$ ,  $n=5$ ) versus zinc-resistant neurons ( $EC_{50}=3.4 \pm 0.4 \mu\text{M}$ ,  $n=13$ ). Red and blue curves without symbols are fitted data obtained in zinc resistant WT ( $EC_{50} = 2.5 \pm 0.4 \mu\text{M}$ ,  $n=6$ ) and KI neurons ( $EC_{50} = 4.4 \pm 0.5 \mu\text{M}$ ,  $n=7$ ), respectively. Note that maximal potentiation did not differ between different neuronal groups. GABA taken at  $EC_{13-16}$ .
