# Supplementary material
Source: PubMed Central journal article supplement (PMC3764863)
Supplement: bph0170-0222-SD2.pdf [file bph0170-0222-SD2.pdf]

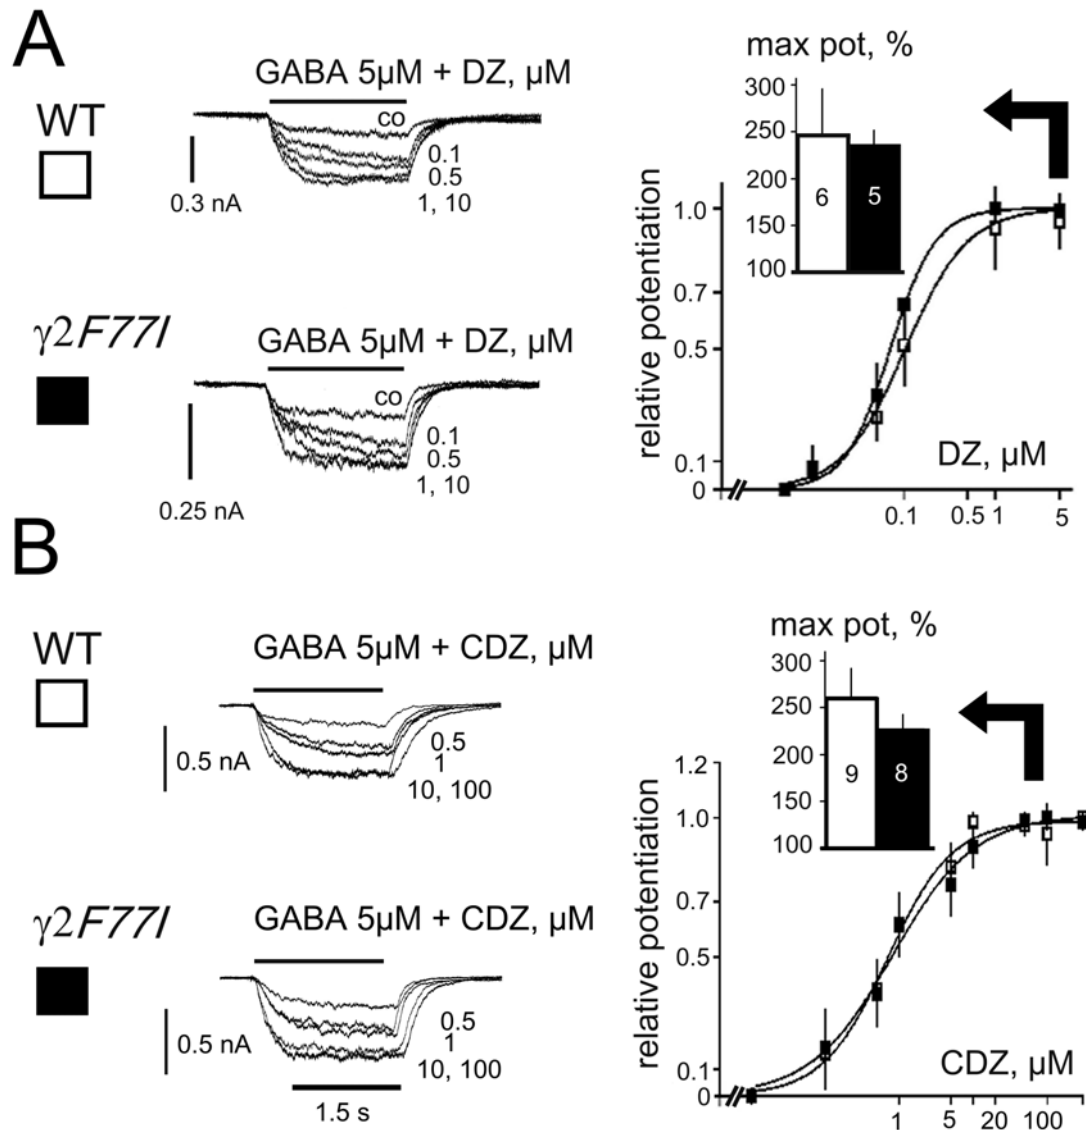

**Supplementary Figure 2. Modulation of GABA-evoked currents by Diazepam (DZ) and chlordiazepoxide (CDZ) in mouse histaminergic neurons.** **A.** Examples of representative recordings (left) and averaged concentration-response diagrams for the relative potentiation of GABA-responses by diazepam (right). Total number of investigated neurons is shown in columns. GABA response amplitude (EC<sub>x</sub>) normalized to maximal control amplitude in these experiments amounted to 16±4% and 12±2% in WT and KI neurons, respectively. **B.** Examples of representative recordings (left) and averaged concentration-response diagrams for the relative potentiation of GABA-responses by CDZ (right). Total number of investigated neurons is shown in columns. The GABA EC<sub>x</sub> in these experiments amounted to 19±5% and 14±2% in WT and KI neurons, respectively.
